# Supplementary material for: Graphene-based 3D composite hydrogel by anchoring Co3O4 nanoparticles with enhanced electrochemical properties
Source: Royal Society of Chemistry journal article supplement (doi:10.1039/c3cp51710a), 2013-01-01
Supplement: c3cp51710a.pdf [file c3cp51710a.pdf]

## Supporting Information

### Graphene-based 3D Composite Hydrogel by Anchoring Co<sub>3</sub>O<sub>4</sub> Nanoparticles with Enhanced Electrochemical Properties

Jingjing Yuan<sup>a,c</sup>, Junwu Zhu<sup>a\*</sup>, Huiping Bi<sup>a</sup>, Xiaoqian Meng<sup>a</sup>, Shiming Liang<sup>a</sup>, Lili Zhang<sup>b</sup>, Xin  
5 Wang<sup>a\*</sup>

a Institute of chemical technology, Nanjing University of Science and Technology, Nanjing 210000, China

b Jiangsu Key Laboratory for Chemistry of Low-Dimensional Materials (Huaiyin Normal University) Huaian 223300,  
China

c Institute of Jiangnan Graphene Research, Changzhou 213100, China

#### 10 SI-1. Electrochemical Measurement with a two-electrode system

The electrochemical measurements of as-obtained products were conducted using a two-electrode system for comparison.

The detail procedure of experiment is as following: First, the water of prepared Co<sub>3</sub>O<sub>4</sub>/graphene hydrogel (CGH) composites was exchanged with 6 M KOH electrolyte for 2 h before tests. Then two  
15 pieces of CGH were attached on platinum foils, the symmetry parts were assembled with a neutral paper sandwiched between the hydrogel. A platinum wire was clipped onto the foil by a clip at the end of each platinum foil, which was connected with CHI 660B for CV and galvanostatic charge-discharge measurements between 0 V and 1 V. The specific capacitance, energy density and maximum peak power density of the electrodes were calculated according to the equation reported previously<sup>[1]</sup>.

#### 20 SI-2. Additional electrochemical data of CGH and GH with a two-electrode system

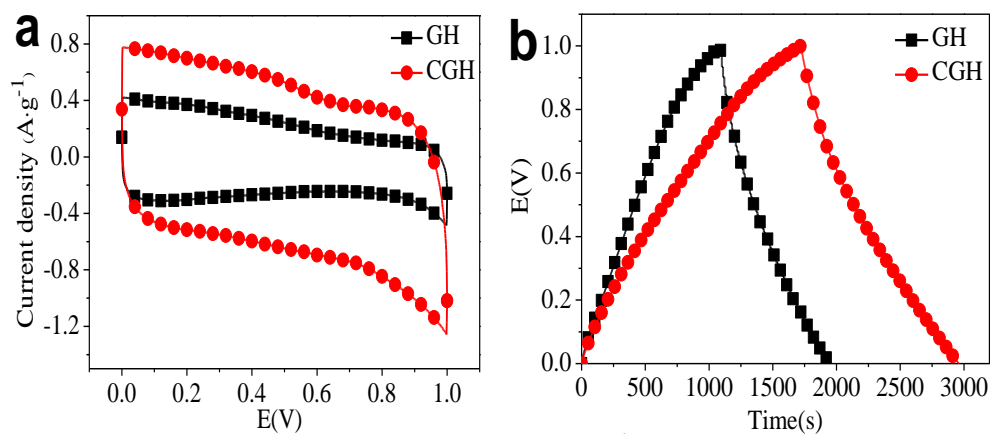

**Figure S1** (a) CV measurements of CGH and GH at 5 mV·s<sup>-1</sup>; (b) Galvanostatic charge/discharge tests of CGH and GH at 0.5 A·g<sup>-1</sup>.

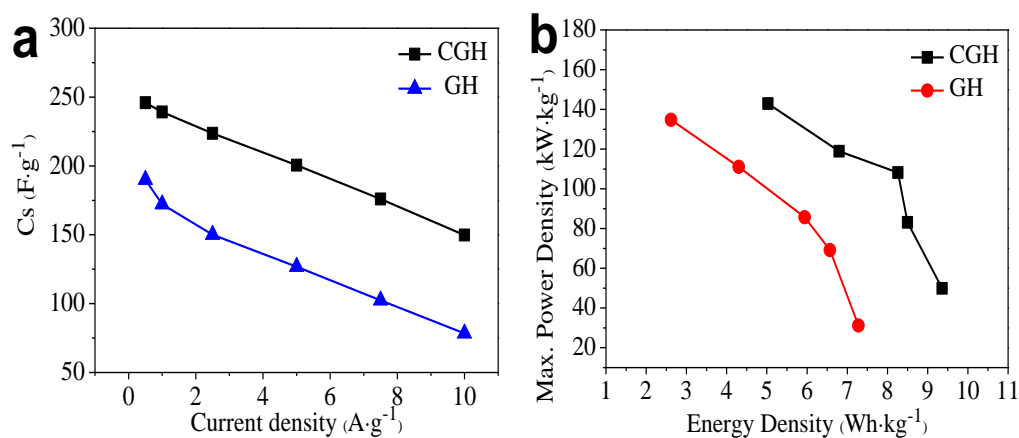

**Figure S2** (a) Gravimetric capacitances of CGH and GH measured at various current densities; (b) Ragone plots of CGH and GH.

### SI-3. Nyquist plots of CGH, Co<sub>3</sub>O<sub>4</sub> and GH with a three-electrode system

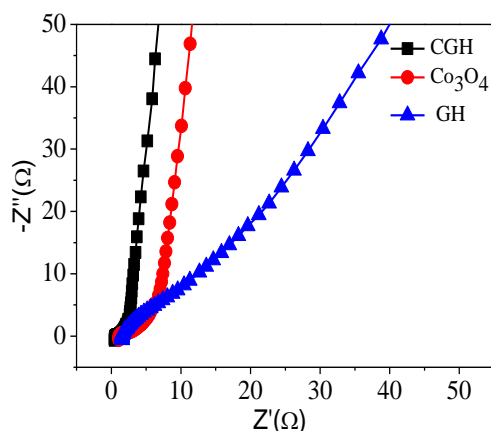

**Figure S3** the Nyquist plots of CGH, Co<sub>3</sub>O<sub>4</sub> and GH.

## References

- [1] X. W. Yang, J. W. Zhu, L. Qiu, D. Li. *Adv. Mater.*, 23 (2011) 2833–2838.
